# Supplementary material
Source: publisher figshare collection journal article supplement (https://acs.figshare.com/ndownloader/files/3871234)
Supplement: Supplementary file 1 [file 3871234]

## **Supporting Information**

Lithium Titanate Epitaxial Coating on Spinel

Lithium Manganese Oxide Surface for Improving  
the Performance of Lithium Storage Capability

Jili Li, Youqi Zhu, Lin Wang, and Chuanbao Cao\*

Research Center of Materials Science, Beijing Institute of Technology, Beijing 100081, China

\*Corresponding author's e-mail: cbcao@bit.edu.cn

Fax: +86-10-6891 3792

Tel: +86-10-6891 2001

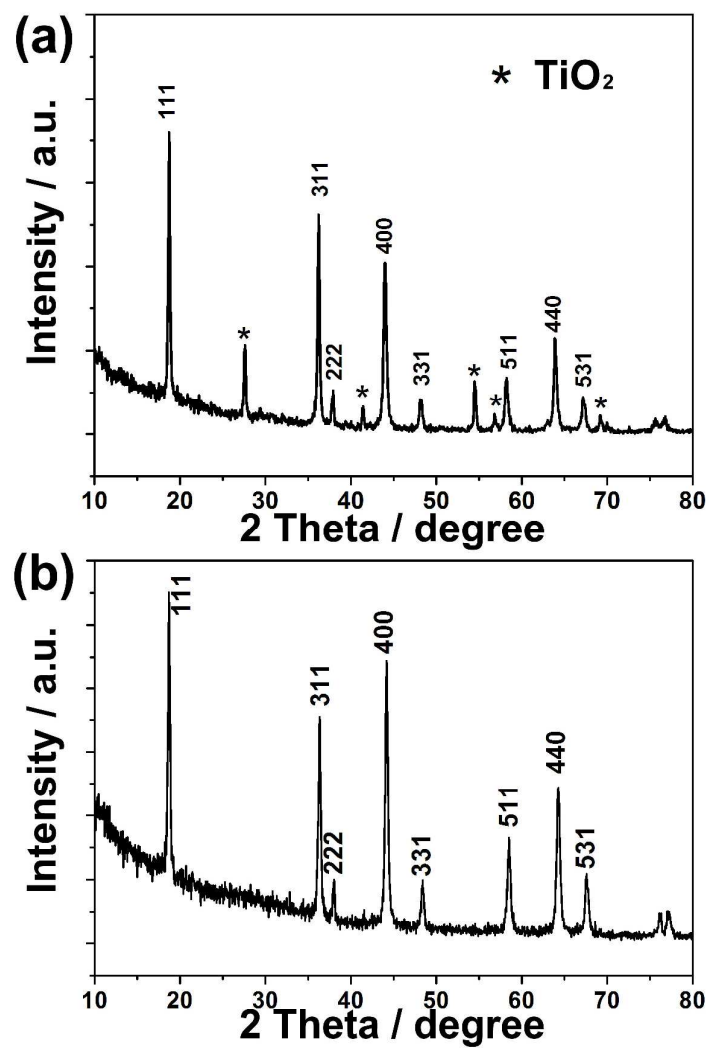

**Figure S1.** The XRD patterns of 10 wt% coated LMO@TiO<sub>2</sub> (a) and LMO@LTO (b).

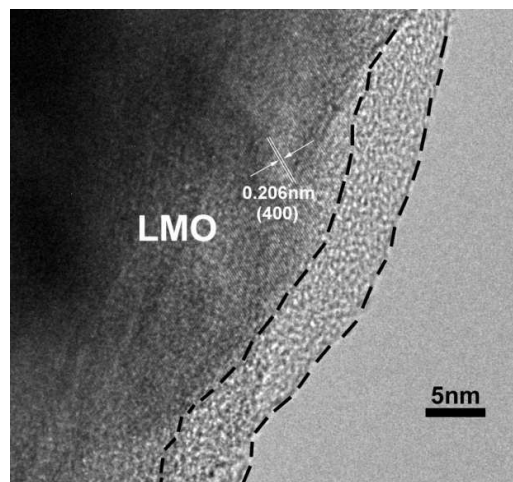

**Figure S2.** The HR-TEM image of precursor of LMO@TiO<sub>2</sub> and EC-LMO@LTO before annealing.

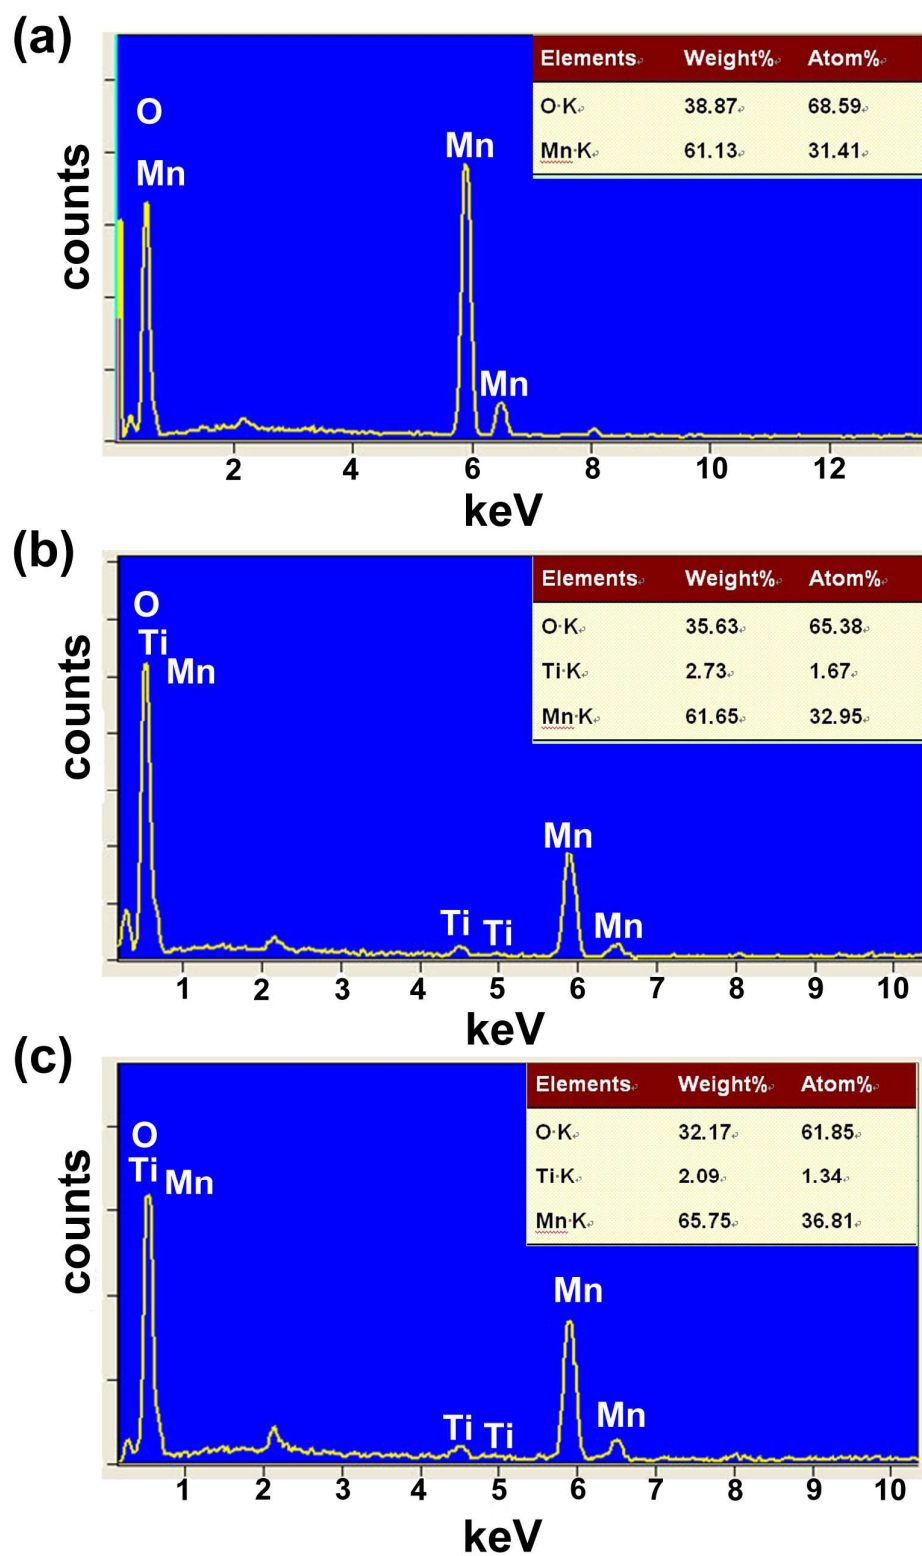

**Figure S3.** EDX results of uncoated LMO (a), LMO@TiO<sub>2</sub> (b) and EC-LMO@LTO (c).

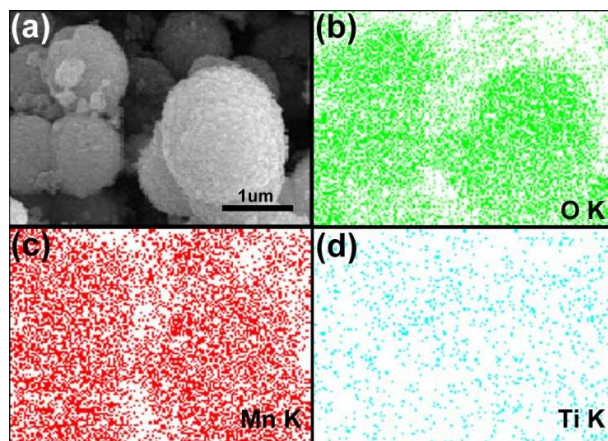

**Figure S4.** SEM image of EC-LMO@LTO (a) and corresponding element maps: O K (green) (b), Mn K (red) (c), Ti K (blue) (d).

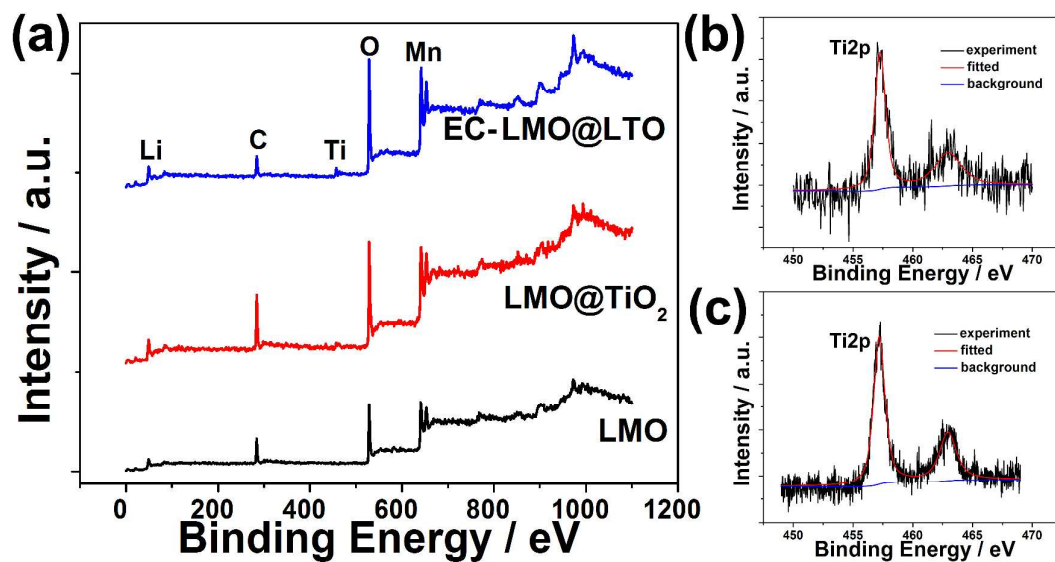

**Figure S5.** (a) The XPS patterns of LMO, LMO@TiO<sub>2</sub> and EC-LMO@LTO. The high resolution XPS spectra of the Ti2p region present in LMO@TiO<sub>2</sub> (b) and EC-LMO@LTO (c).

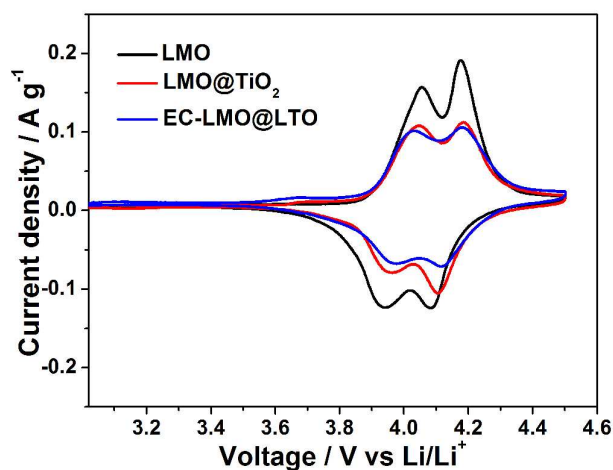

**Figure S6.** The CV curves of LMO, LMO@TiO<sub>2</sub> and EC-LMO@LTO at the first cycle between 3 and 4.5 V. Scan rate: 0.1 mV s<sup>-1</sup>

**Table S1.** Summary of the CV results for LMO, LMO@TiO<sub>2</sub> and EC-LMO@LTO cathodes.<sup>[a]</sup>

| Sample               | Potential Values / V |       |             |       |       |             |
|----------------------|----------------------|-------|-------------|-------|-------|-------------|
|                      | Epa1                 | Epc1  | $\Delta E1$ | Epa2  | Epc2  | $\Delta E2$ |
| LMO                  | 4.055                | 3.944 | 0.111       | 4.175 | 4.084 | 0.091       |
| LMO@TiO <sub>2</sub> | 4.047                | 3.965 | 0.082       | 4.184 | 4.107 | 0.077       |
| EC-LMO@LTO           | 4.032                | 3.977 | 0.055       | 4.175 | 4.115 | 0.060       |

<sup>[a]</sup> Epa: anodic peak potential, Epc: cathodic peak potential,  $\Delta E$ : the separation between Epa and Epc. The subscript numbers 1 and 2 denote the redox couple at lower and higher potential, respectively.

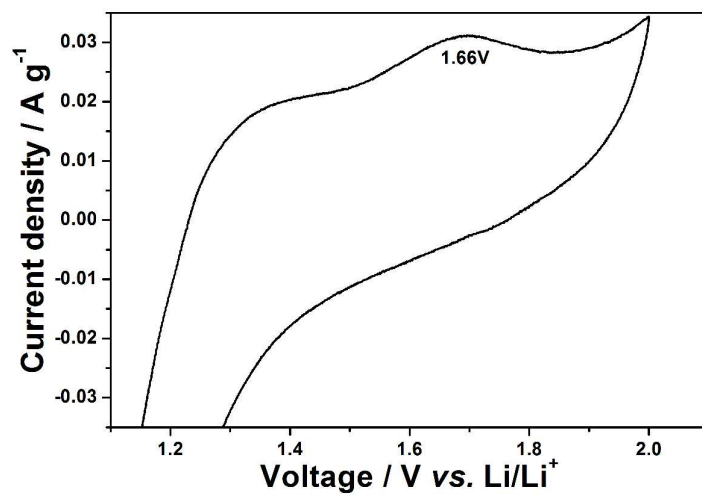

**Figure S7.** The CV curve of EC-LMO@LTO between 1 and 2 V. Scan rate:  $1 \text{ mV s}^{-1}$



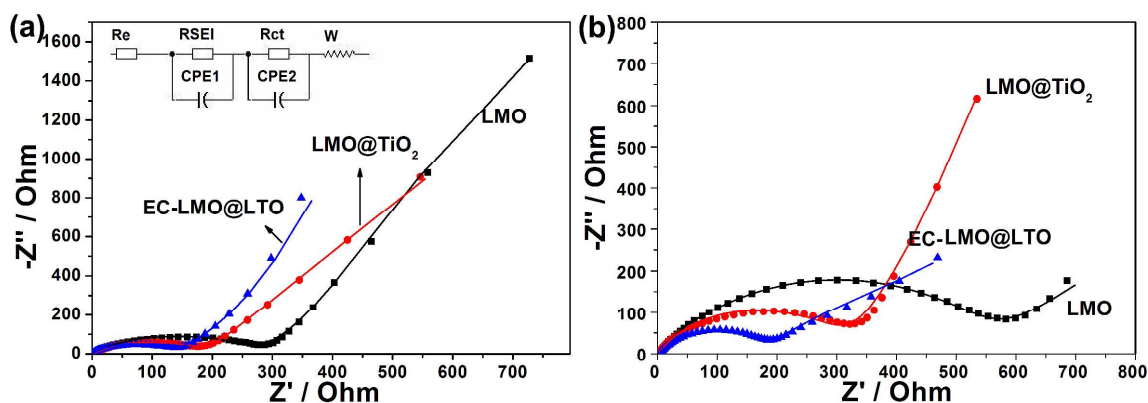

**Figure S8.** Nyquist plots of LMO, LMO@TiO<sub>2</sub> and EC-LMO@LTO cathodes at fresh state (a) and after 100<sup>th</sup> charge/discharge cycles at 1 C (b) over the frequency range between 100 kHz and 0.1 Hz and applying an AC signal of 5 mV. The symbols are the experimental data, whereas the continuous lines are fitted ones.

For all the cathodes, the intercept at the  $Z'$  axis in the high frequency region is due to the combined impedance of the electrolyte and cell components (Re).<sup>1</sup> The semicircles in the high-middle frequency region are the contribution of two semicircles (high and intermediate frequency), which are attributed to the solid electrolyte interface (SEI) resistance (RSEI) corresponding to form a passive surface film on the surface of the cathode materials and the charge-transfer resistance (Rct) in the electrode–electrolyte interfaces.<sup>2</sup> The inclined lines in the lower frequency region reveal the Li<sup>+</sup>-ion diffusion process in the electrode materials, the Warburg impedance (W).<sup>1</sup>

**Table S2.** The fitted combined impedance (resistance) of the electrolyte and cell components (Re), solid electrolyte interface (SEI) resistance (RSEI) and the charge-transfer resistance (Rct) for the Nyquist plots of LMO, LMO@TiO<sub>2</sub> and EC-LMO@LTO before and after 100<sup>th</sup> cycling at 1C rate.

| Sample                       | LMO   | LMO@TiO <sub>2</sub> | EC-LMO@LTO |
|------------------------------|-------|----------------------|------------|
| Re /Ω                        | 1.86  | 2.06                 | 2.34       |
| Re (100 <sup>th</sup> ) /Ω   | 3.68  | 3.45                 | 2.89       |
| RSEI /Ω                      | 28.5  | 18.5                 | 11.81      |
| RSEI (100 <sup>th</sup> ) /Ω | 38.55 | 25.2                 | 14.5       |
| Rct /Ω                       | 260.5 | 168.9                | 122.4      |
| Rct (100 <sup>th</sup> ) /Ω  | 500.4 | 275.7                | 178.1      |

**Table S3.** Calculated  $\text{Li}^+$  ion diffusion coefficient (D) in as-prepared materials from EIS results ( $18.6 \text{ Hz} < \omega < 0.1 \text{ Hz}$ ) before cycling.

| Sample                              | LMO       | LMO@TiO <sub>2</sub> | EC-LMO@LTO |
|-------------------------------------|-----------|----------------------|------------|
| D(cm <sup>2</sup> s <sup>-1</sup> ) | 1.318E-13 | 1.837E-13            | 5.299E-13  |

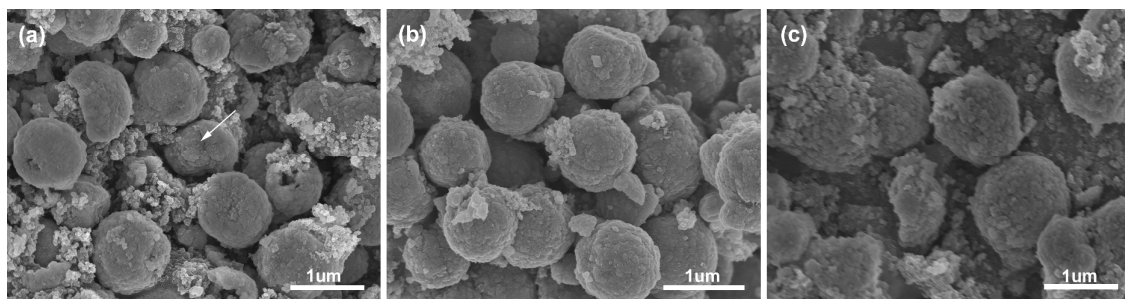

**Figure S9.** The morphology of LMO (a), LMO@TiO<sub>2</sub> (b) and EC-LMO@LTO (c) after 100 charge and discharge cycles at 1 C at 25 °C.

- (1) Shi, S.J.; Tu, J.P.; Tang, Y.Y.; Liu, X.Y.; Zhang, Y.Q.; Wang, X.L.; Gu, C.D. Enhanced Cycling Stability of  $\text{Li}[\text{Li}_{0.2}\text{Mn}_{0.54}\text{Ni}_{0.13}\text{Co}_{0.13}]\text{O}_2$  by Surface Modification of MgO with Melting Impregnation Method. *Electrochim. Acta* **2013**, *88*, 671–679.
- (2) Zhao, S.; Bai, Y.; Chang, Q.J.; Yangm Y.Q.; Zhang W.F. Surface Modification of Spinel  $\text{LiMn}_2\text{O}_4$  with  $\text{FeF}_3$  for Lithium Ion Batteries. *Electrochim. Acta* **2013**, *108*, 727–735.
